# Supplementary material for: Novel Tetranuclear Heterometallic Mn3Ni and Mononuclear Ni Complexes with an ONO Schiff Base Ligand: Synthesis, Crystal Structures, and Magnetic Properties
Source: MDPI journal article supplement (doi:10.3390/magnetochemistry9110225), 2023-11-03
Supplement: s1 [file s1]

# Supplementary Materials

## Novel Tetranuclear Heterometallic Mn<sub>3</sub>Ni Complex and Mononuclear Ni Complexes with an *ONO* Schiff Base Ligand: Synthesis, Crystal Structures, and Magnetic Properties

Masato Fukuda <sup>1</sup>, Ken Eguchi <sup>1</sup>, Kazuma Matsumoto <sup>1</sup>, Ko Yoneda <sup>1</sup>, Yasunori Yamada <sup>1</sup>, Haruka Yoshino <sup>2,3</sup>, Yuki Imamura <sup>3</sup>, Naoya Yamamoto <sup>3</sup>, Masaaki Ohba <sup>3</sup>, and Masayuki Koikawa <sup>1,\*</sup>

<sup>1</sup> Department of Chemistry and Applied Chemistry, Faculty of Science and Engineering, Saga University, Honjo 1, Saga 840-8502, Japan

<sup>2</sup> Institute for Materials Research, Tohoku University, 2-1-1 Katahira, Aoba-ku, Sendai 980-8577, Japan; haruka.yoshino.a2@tohoku.ac.jp

<sup>3</sup> Department of Chemistry, Faculty of Science, Kyushu University, 744 Motooka, Nishi-ku, Fukuoka 819-0395, Japan; ohba@chem.kyushu-univ.jp

\* Correspondence: koikawa@cc.saga-u.ac.jp; Tel.: +81-952-28-8549

**Table S1 Crystal data and structure refinement for 1.**

|                                                              |                                                                              |
|--------------------------------------------------------------|------------------------------------------------------------------------------|
| Empirical formula                                            | C <sub>30</sub> H <sub>32</sub> N <sub>2</sub> NiO <sub>6</sub>              |
| Formula weight                                               | 575.28                                                                       |
| Temperature/K                                                | 113.15                                                                       |
| Crystal system                                               | monoclinic                                                                   |
| Space group                                                  | <i>P</i> 2 <sub>1</sub> / <i>c</i>                                           |
| <i>a</i> /Å                                                  | 10.716(5)                                                                    |
| <i>b</i> /Å                                                  | 20.271(8)                                                                    |
| <i>c</i> /Å                                                  | 13.487(6)                                                                    |
| $\alpha$ /°                                                  | 90                                                                           |
| $\beta$ /°                                                   | 112.614(6)                                                                   |
| $\gamma$ /°                                                  | 90                                                                           |
| Volume/Å <sup>3</sup>                                        | 2704(2)                                                                      |
| <i>Z</i>                                                     | 4                                                                            |
| $\rho_{\text{calc}}$ /g/cm <sup>3</sup>                      | 1.413                                                                        |
| $\mu$ /mm <sup>-1</sup>                                      | 0.765                                                                        |
| <i>F</i> (000)                                               | 1208.0                                                                       |
| Crystal size/mm <sup>3</sup>                                 | 0.29 × 0.19 × 0.18                                                           |
| Radiation                                                    | MoK $\alpha$ ( $\lambda$ = 0.71075)                                          |
| 2 $\theta$ range for data collection/°                       | 6.25 to 54.974                                                               |
| Index ranges                                                 | -13 ≤ <i>h</i> ≤ 11, -26 ≤ <i>k</i> ≤ 26, -17 ≤ <i>l</i> ≤ 14                |
| Reflections collected                                        | 22107                                                                        |
| Independent reflections                                      | 6058 [ <i>R</i> <sub>int</sub> = 0.0329, <i>R</i> <sub>sigma</sub> = 0.0312] |
| Data/restraints/parameters                                   | 6058/0/359                                                                   |
| Goodness-of-fit on <i>F</i> <sup>2</sup>                     | 1.071                                                                        |
| Final <i>R</i> indexes [ <i>I</i> ≥ 2 $\sigma$ ( <i>I</i> )] | <i>R</i> <sub>1</sub> = 0.0404, <i>wR</i> <sub>2</sub> = 0.1056              |
| Final <i>R</i> indexes [all data]                            | <i>R</i> <sub>1</sub> = 0.0476, <i>wR</i> <sub>2</sub> = 0.1123              |
| Largest diff. peak/hole / e Å <sup>-3</sup>                  | 0.65/-0.55                                                                   |

**Table S2 Bond Lengths for 1.**

| Atom | Atom | Length/Å    | Atom | Atom | Length/Å  |
|------|------|-------------|------|------|-----------|
| Ni1  | O1   | 2.1064 (15) | C9   | C10  | 1.409 (3) |
| Ni1  | O2   | 2.0113 (15) | C9   | C14  | 1.420 (3) |
| Ni1  | O3   | 2.1103 (16) | C10  | C11  | 1.379 (3) |
| Ni1  | O4   | 2.0319 (15) | C11  | C12  | 1.396 (4) |
| Ni1  | N1   | 2.0531 (17) | C12  | C13  | 1.382 (3) |
| Ni1  | N2   | 2.0486 (17) | C13  | C14  | 1.416 (3) |
| O1   | C1   | 1.441 (3)   | C15  | C16  | 1.509 (3) |
| O2   | C14  | 1.311 (2)   | C16  | C17  | 1.391 (3) |
| O3   | C15  | 1.443 (2)   | C16  | C21  | 1.406 (3) |
| O4   | C28  | 1.337 (2)   | C17  | C18  | 1.390 (3) |
| N1   | C7   | 1.419 (3)   | C18  | C19  | 1.386 (3) |
| N1   | C8   | 1.291 (2)   | C19  | C20  | 1.390 (3) |
| N2   | C21  | 1.426 (3)   | C20  | C21  | 1.392 (3) |
| N2   | C22  | 1.287 (3)   | C22  | C23  | 1.444 (3) |
| C1   | C2   | 1.509 (3)   | C23  | C24  | 1.409 (3) |
| C2   | C3   | 1.390 (3)   | C23  | C28  | 1.418 (3) |
| C2   | C7   | 1.408 (3)   | C24  | C25  | 1.379 (3) |
| C3   | C4   | 1.393 (4)   | C25  | C26  | 1.394 (3) |
| C4   | C5   | 1.374 (4)   | C26  | C27  | 1.381 (3) |
| C5   | C6   | 1.396 (3)   | C27  | C28  | 1.404 (3) |
| C6   | C7   | 1.384 (3)   | O5   | C29  | 1.412 (4) |
| C8   | C9   | 1.447 (3)   | O6   | C30  | 1.400 (4) |

**Table S3 Bond Angles for 1.**

| Atom | Atom | Atom | Angle/°     | Atom | Atom | Atom | Angle/°     |
|------|------|------|-------------|------|------|------|-------------|
| O1   | Ni1  | O3   | 85.54 (6)   | C6   | C7   | C2   | 121.05 (19) |
| O2   | Ni1  | O1   | 95.38 (6)   | N1   | C8   | C9   | 123.62 (18) |
| O2   | Ni1  | O3   | 173.67 (6)  | C10  | C9   | C8   | 117.79 (19) |
| O2   | Ni1  | O4   | 89.90 (7)   | C10  | C9   | C14  | 120.26 (19) |
| O2   | Ni1  | N1   | 85.16 (7)   | C14  | C9   | C8   | 121.68 (17) |
| O2   | Ni1  | N2   | 94.18 (6)   | C11  | C10  | C9   | 121.1 (2)   |
| O4   | Ni1  | O1   | 89.93 (6)   | C10  | C11  | C12  | 118.9 (2)   |
| O4   | Ni1  | O3   | 96.37 (6)   | C13  | C12  | C11  | 121.4 (2)   |
| O4   | Ni1  | N1   | 174.39 (6)  | C12  | C13  | C14  | 120.8 (2)   |
| O4   | Ni1  | N2   | 85.88 (7)   | O2   | C14  | C9   | 123.27 (18) |
| N1   | Ni1  | O1   | 87.89 (6)   | O2   | C14  | C13  | 119.25 (19) |
| N1   | Ni1  | O3   | 88.61 (7)   | C13  | C14  | C9   | 117.47 (18) |
| N2   | Ni1  | O1   | 169.56 (6)  | O3   | C15  | C16  | 109.17 (16) |
| N2   | Ni1  | O3   | 85.43 (6)   | C17  | C16  | C15  | 121.61 (18) |
| N2   | Ni1  | N1   | 97.12 (7)   | C17  | C16  | C21  | 118.35 (18) |
| C1   | O1   | Ni1  | 115.63 (11) | C21  | C16  | C15  | 120.01 (18) |
| C14  | O2   | Ni1  | 117.35 (13) | C18  | C17  | C16  | 120.9 (2)   |
| C15  | O3   | Ni1  | 120.97 (12) | C19  | C18  | C17  | 120.2 (2)   |
| C28  | O4   | Ni1  | 117.54 (12) | C18  | C19  | C20  | 120.05 (19) |
| C7   | N1   | Ni1  | 119.03 (12) | C19  | C20  | C21  | 119.61 (19) |
| C8   | N1   | Ni1  | 121.77 (14) | C16  | C21  | N2   | 116.82 (17) |
| C8   | N1   | C7   | 119.19 (17) | C20  | C21  | N2   | 122.06 (18) |

**Table S3 Bond Angles for 1.**

| Atom Atom Atom | Angle/°     | Atom Atom Atom | Angle/°     |
|----------------|-------------|----------------|-------------|
| C21 N2 Ni1     | 116.02 (12) | C20 C21 C16    | 120.90 (18) |
| C22 N2 Ni1     | 123.16 (14) | N2 C22 C23     | 123.75 (18) |
| C22 N2 C21     | 120.56 (17) | C24 C23 C22    | 117.54 (18) |
| O1 C1 C2       | 112.99 (17) | C24 C23 C28    | 119.25 (19) |
| C3 C2 C1       | 122.0 (2)   | C28 C23 C22    | 123.09 (18) |
| C3 C2 C7       | 118.2 (2)   | C25 C24 C23    | 121.8 (2)   |
| C7 C2 C1       | 119.70 (18) | C24 C25 C26    | 118.7 (2)   |
| C2 C3 C4       | 120.7 (2)   | C27 C26 C25    | 120.7 (2)   |
| C5 C4 C3       | 120.2 (2)   | C26 C27 C28    | 121.6 (2)   |
| C4 C5 C6       | 120.3 (2)   | O4 C28 C23     | 122.61 (18) |
| C7 C6 C5       | 119.4 (2)   | O4 C28 C27     | 119.48 (18) |
| C2 C7 N1       | 115.77 (18) | C27 C28 C23    | 117.87 (18) |
| C6 C7 N1       | 123.17 (19) |                |             |

**Table S4 Hydrogen Bonds for 1.**

| D H A                 | d(D-H)/Å | d(H-A)/Å | d(D-A)/Å  | D-H-A/° |
|-----------------------|----------|----------|-----------|---------|
| O1 H1 O4 <sup>1</sup> | 0.84     | 1.86     | 2.686 (2) | 165.6   |
| O3 H3 O4 <sup>1</sup> | 0.84     | 1.87     | 2.641 (2) | 152.9   |
| O5 H5A O2             | 0.84     | 1.88     | 2.678 (2) | 158.2   |
| O6 H6A O5             | 0.84     | 1.92     | 2.763 (3) | 175.8   |

<sup>1</sup>1-X,1-Y,1-Z**Table S5. Crystal data and structure refinement for 2.**

|                                    |                                                                                                  |
|------------------------------------|--------------------------------------------------------------------------------------------------|
| Empirical formula                  | C <sub>60</sub> H <sub>56</sub> Cl <sub>2</sub> Mn <sub>3</sub> N <sub>4</sub> NiO <sub>10</sub> |
| Formula weight                     | 1287.51                                                                                          |
| Temperature/K                      | 113.00                                                                                           |
| Crystal system                     | orthorhombic                                                                                     |
| Space group                        | <i>Aea</i> 2                                                                                     |
| a/Å                                | 12.180(6)                                                                                        |
| b/Å                                | 22.558(11)                                                                                       |
| c/Å                                | 19.913(11)                                                                                       |
| α/°                                | 90                                                                                               |
| β/°                                | 90                                                                                               |
| γ/°                                | 90                                                                                               |
| Volume/Å <sup>3</sup>              | 5471(5)                                                                                          |
| Z                                  | 4                                                                                                |
| ρ <sub>calc</sub> /cm <sup>3</sup> | 1.563                                                                                            |
| μ/mm <sup>-1</sup>                 | 1.178                                                                                            |
| F(000)                             | 2644.0                                                                                           |
| Crystal size/mm <sup>3</sup>       | 0.2 × 0.2 × 0.2                                                                                  |
| Radiation                          | MoKα (λ = 0.71075)                                                                               |
| 2θ range for data collection/°     | 6.402 to 55.02                                                                                   |
| Index ranges                       | -15 ≤ h ≤ 15, -28 ≤ k ≤ 28, -25 ≤ l ≤ 25                                                         |
| Reflections collected              | 22017                                                                                            |
| Independent reflections            | 6184 [R <sub>int</sub> = 0.0301, R <sub>sigma</sub> = 0.0352]                                    |
| Data/restraints/parameters         | 6184/1/365                                                                                       |
| Goodness-of-fit on F <sup>2</sup>  | 1.077                                                                                            |

Final R indexes [ $I \geq 2\sigma(I)$ ]  $R_1 = 0.0218$ ,  $wR_2 = 0.0546$   
 Final R indexes [all data]  $R_1 = 0.0220$ ,  $wR_2 = 0.0548$   
 Largest diff. peak/hole /  $e \text{ \AA}^{-3}$  0.30/-0.29  
 Flack parameter 0.010(4)

**Table S6. Bond Lengths for 2.**

| Atom | Atom             | Length/ $\text{\AA}$ | Atom | Atom | Length/ $\text{\AA}$ |
|------|------------------|----------------------|------|------|----------------------|
| Ni1  | Ni1 <sup>1</sup> | 0.0000 (8)           | C14  | C9   | 1.420 (3)            |
| Ni1  | Mn1 <sup>1</sup> | 3.1004 (10)          | C14  | C13  | 1.401 (3)            |
| Ni1  | O2 <sup>1</sup>  | 2.0453 (18)          | C8   | C9   | 1.456 (3)            |
| Ni1  | O2               | 2.0454 (18)          | C9   | C10  | 1.404 (3)            |
| Ni1  | O1 <sup>1</sup>  | 2.0937 (18)          | C13  | C12  | 1.387 (3)            |
| Ni1  | O1               | 2.0937 (18)          | C21  | C16  | 1.396 (3)            |
| Ni1  | N1               | 2.022 (2)            | C21  | C20  | 1.402 (3)            |
| Ni1  | N1 <sup>1</sup>  | 2.022 (2)            | C2   | C7   | 1.398 (3)            |
| Mn1  | O3               | 1.8761 (17)          | C2   | C1   | 1.524 (3)            |
| Mn1  | O2               | 2.1820 (17)          | C2   | C3   | 1.399 (3)            |
| Mn1  | O1               | 1.9756 (16)          | C24  | C23  | 1.414 (3)            |
| Mn1  | O4               | 1.8607 (17)          | C24  | C25  | 1.370 (3)            |
| Mn1  | O5               | 2.2587 (18)          | C22  | C23  | 1.425 (3)            |
| Mn1  | N2               | 2.0431 (19)          | C16  | C17  | 1.390 (3)            |
| Mn2  | Cl1 <sup>1</sup> | 2.4560 (10)          | C16  | C15  | 1.515 (3)            |
| Mn2  | Cl1              | 2.4560 (10)          | C23  | C28  | 1.418 (4)            |
| Mn2  | O3 <sup>1</sup>  | 2.1765 (18)          | C7   | C6   | 1.394 (3)            |
| Mn2  | O3               | 2.1765 (18)          | C28  | C27  | 1.407 (3)            |
| Mn2  | O1 <sup>1</sup>  | 2.3145 (18)          | C12  | C11  | 1.390 (3)            |
| Mn2  | O1               | 2.3145 (18)          | C18  | C17  | 1.392 (3)            |
| O3   | C15              | 1.418 (3)            | C18  | C19  | 1.378 (3)            |
| O2   | C14              | 1.335 (3)            | C11  | C10  | 1.377 (3)            |
| O1   | C1               | 1.428 (2)            | C26  | C27  | 1.381 (3)            |
| O4   | C28              | 1.323 (3)            | C26  | C25  | 1.403 (4)            |
| O5   | C29              | 1.432 (3)            | C3   | C4   | 1.382 (3)            |
| N2   | C21              | 1.431 (3)            | C6   | C5   | 1.386 (3)            |
| N2   | C22              | 1.298 (3)            | C19  | C20  | 1.395 (3)            |
| N1   | C8               | 1.279 (3)            | C29  | C30  | 1.517 (4)            |
| N1   | C7               | 1.432 (3)            | C4   | C5   | 1.384 (4)            |

<sup>1</sup>1-X,1-Y,+Z

**Table S7. Bond Angles for 2.**

| Atom             | Atom | Atom             | Angle/ $^\circ$ | Atom             | Atom | Atom             | Angle/ $^\circ$ |
|------------------|------|------------------|-----------------|------------------|------|------------------|-----------------|
| Ni1 <sup>1</sup> | Ni1  | Mn1 <sup>1</sup> | 0 (8)           | Ni1 <sup>1</sup> | O1   | Ni1              | 0.000 (15)      |
| Ni1 <sup>1</sup> | Ni1  | O2 <sup>1</sup>  | 0 (10)          | Ni1 <sup>1</sup> | O1   | Mn2              | 96.98 (7)       |
| Ni1 <sup>1</sup> | Ni1  | O2               | 0 (10)          | Ni1              | O1   | Mn2              | 96.98 (7)       |
| Ni1 <sup>1</sup> | Ni1  | O1 <sup>1</sup>  | 0 (10)          | Mn1              | O1   | Ni1              | 99.22 (7)       |
| Ni1 <sup>1</sup> | Ni1  | O1               | 0 (10)          | Mn1              | O1   | Ni1 <sup>1</sup> | 99.22 (7)       |
| Ni1 <sup>1</sup> | Ni1  | N1               | 0 (10)          | Mn1              | O1   | Mn2              | 97.09 (6)       |
| Ni1 <sup>1</sup> | Ni1  | N1 <sup>1</sup>  | 0 (10)          | C1               | O1   | Ni1 <sup>1</sup> | 120.02 (13)     |
| O2 <sup>1</sup>  | Ni1  | Mn1 <sup>1</sup> | 44.57 (4)       | C1               | O1   | Ni1              | 120.02 (13)     |
| O2               | Ni1  | Mn1 <sup>1</sup> | 135.91 (5)      | C1               | O1   | Mn1              | 118.39 (12)     |

**Table S7. Bond Angles for 2.**

| Atom Atom Atom                       | Angle/°     | Atom Atom Atom          | Angle/°     |
|--------------------------------------|-------------|-------------------------|-------------|
| O2 <sup>1</sup> Ni1 O2               | 179.32 (9)  | C1 O1 Mn2               | 120.25 (13) |
| O2 Ni1 O1 <sup>1</sup>               | 96.96 (6)   | C28 O4 Mn1              | 127.11 (15) |
| O2 <sup>1</sup> Ni1 O1 <sup>1</sup>  | 83.53 (6)   | C29 O5 Mn1              | 125.35 (14) |
| O2 <sup>1</sup> Ni1 O1               | 96.96 (6)   | C21 N2 Mn1              | 120.62 (14) |
| O2 Ni1 O1                            | 83.53 (6)   | C22 N2 Mn1              | 120.86 (15) |
| O1 <sup>1</sup> Ni1 Mn1 <sup>1</sup> | 38.97 (4)   | C22 N2 C21              | 118.51 (18) |
| O1 Ni1 Mn1 <sup>1</sup>              | 93.77 (5)   | Ni1 <sup>1</sup> N1 Ni1 | 0.000 (17)  |
| O1 <sup>1</sup> Ni1 O1               | 88.09 (10)  | C8 N1 Ni1               | 124.48 (16) |
| N1 <sup>1</sup> Ni1 Mn1 <sup>1</sup> | 83.32 (6)   | C8 N1 Ni1 <sup>1</sup>  | 124.48 (16) |
| N1 Ni1 Mn1 <sup>1</sup>              | 137.89 (6)  | C8 N1 C7                | 118.50 (19) |
| N1 Ni1 O2 <sup>1</sup>               | 93.65 (7)   | C7 N1 Ni1 <sup>1</sup>  | 117.01 (14) |
| N1 Ni1 O2                            | 85.91 (7)   | C7 N1 Ni1               | 117.01 (14) |
| N1 <sup>1</sup> Ni1 O2 <sup>1</sup>  | 85.91 (7)   | O2 C14 C9               | 122.53 (19) |
| N1 <sup>1</sup> Ni1 O2               | 93.66 (7)   | O2 C14 C13              | 119.46 (19) |
| N1 Ni1 O1                            | 85.24 (8)   | C13 C14 C9              | 117.9 (2)   |
| N1 Ni1 O1 <sup>1</sup>               | 172.41 (7)  | N1 C8 C9                | 123.8 (2)   |
| N1 <sup>1</sup> Ni1 O1 <sup>1</sup>  | 85.24 (8)   | C14 C9 C8               | 122.63 (19) |
| N1 <sup>1</sup> Ni1 O1               | 172.41 (7)  | C10 C9 C14              | 119.3 (2)   |
| N1 Ni1 N1 <sup>1</sup>               | 101.63 (11) | C10 C9 C8               | 117.42 (19) |
| O3 Mn1 O2                            | 87.67 (7)   | C12 C13 C14             | 121.4 (2)   |
| O3 Mn1 O1                            | 85.36 (7)   | C16 C21 N2              | 119.80 (18) |
| O3 Mn1 O5                            | 84.01 (8)   | C16 C21 C20             | 120.1 (2)   |
| O3 Mn1 N2                            | 93.46 (7)   | C20 C21 N2              | 120.10 (19) |
| O2 Mn1 O5                            | 171.54 (6)  | C7 C2 C1                | 127.70 (19) |
| O1 Mn1 O2                            | 82.93 (6)   | C7 C2 C3                | 117.5 (2)   |
| O1 Mn1 O5                            | 94.89 (7)   | C3 C2 C1                | 114.61 (19) |
| O1 Mn1 N2                            | 175.19 (7)  | C25 C24 C23             | 120.9 (2)   |
| O4 Mn1 O3                            | 171.21 (7)  | N2 C22 C23              | 126.7 (2)   |
| O4 Mn1 O2                            | 100.21 (8)  | C21 C16 C15             | 121.50 (19) |
| O4 Mn1 O1                            | 91.70 (7)   | C17 C16 C21             | 118.5 (2)   |
| O4 Mn1 O5                            | 88.00 (8)   | C17 C16 C15             | 120.0 (2)   |
| O4 Mn1 N2                            | 90.12 (7)   | C24 C23 C22             | 118.9 (2)   |
| N2 Mn1 O2                            | 92.36 (7)   | C24 C23 C28             | 118.6 (2)   |
| N2 Mn1 O5                            | 89.62 (7)   | C28 C23 C22             | 122.5 (2)   |
| Cl1 <sup>1</sup> Mn2 Cl1             | 103.66 (5)  | C2 C7 N1                | 118.31 (19) |
| O3 Mn2 Cl1                           | 99.84 (5)   | C6 C7 N1                | 120.9 (2)   |
| O3 <sup>1</sup> Mn2 Cl1              | 96.56 (5)   | C6 C7 C2                | 120.8 (2)   |
| O3 <sup>1</sup> Mn2 Cl1 <sup>1</sup> | 99.85 (5)   | O1 C1 C2                | 118.79 (18) |
| O3 Mn2 Cl1 <sup>1</sup>              | 96.56 (5)   | O4 C28 C23              | 122.3 (2)   |
| O3 <sup>1</sup> Mn2 O3               | 153.32 (9)  | O4 C28 C27              | 118.0 (2)   |
| O3 Mn2 O1 <sup>1</sup>               | 88.04 (6)   | C27 C28 C23             | 119.7 (2)   |
| O3 <sup>1</sup> Mn2 O1               | 88.04 (6)   | C13 C12 C11             | 120.5 (2)   |
| O3 Mn2 O1                            | 71.05 (5)   | C19 C18 C17             | 119.5 (2)   |
| O3 <sup>1</sup> Mn2 O1 <sup>1</sup>  | 71.05 (5)   | C10 C11 C12             | 119.1 (2)   |
| O1 <sup>1</sup> Mn2 Cl1              | 162.96 (4)  | C27 C26 C25             | 120.4 (2)   |
| O1 Mn2 Cl1                           | 90.28 (6)   | C4 C3 C2                | 121.7 (2)   |
| O1 Mn2 Cl1 <sup>1</sup>              | 162.96 (4)  | C26 C27 C28             | 120.1 (2)   |
| O1 <sup>1</sup> Mn2 Cl1 <sup>1</sup> | 90.28 (6)   | C5 C6 C7                | 120.4 (2)   |
| O1 Mn2 O1 <sup>1</sup>               | 77.94 (9)   | C16 C17 C18             | 121.7 (2)   |
| Mn1 O3 Mn2                           | 105.13 (7)  | O3 C15 C16              | 112.42 (17) |
| C15 O3 Mn1                           | 118.25 (13) | C24 C25 C26             | 120.3 (2)   |

**Table S7. Bond Angles for 2.**

| Atom             | Atom | Atom             | Angle/°     | Atom | Atom | Atom | Angle/°   |
|------------------|------|------------------|-------------|------|------|------|-----------|
| C15              | O3   | Mn2              | 130.74 (13) | C11  | C10  | C9   | 121.6 (2) |
| Ni1 <sup>1</sup> | O2   | Ni1              | 0.00 (2)    | C18  | C19  | C20  | 120.1 (2) |
| Ni1              | O2   | Mn1              | 94.29 (6)   | C19  | C20  | C21  | 120.0 (2) |
| Ni1 <sup>1</sup> | O2   | Mn1              | 94.29 (6)   | O5   | C29  | C30  | 109.5 (2) |
| C14              | O2   | Ni1              | 118.10 (13) | C3   | C4   | C5   | 120.1 (2) |
| C14              | O2   | Ni1 <sup>1</sup> | 118.10 (13) | C4   | C5   | C6   | 119.4 (2) |
| C14              | O2   | Mn1              | 125.02 (13) |      |      |      |           |

<sup>1</sup>1-X,1-Y,+Z**Table S8. Hydrogen Bonds for 2.**

| D  | H  | A   | d(D-H)/Å | d(H-A)/Å | d(D-A)/Å    | D-H-A/° |
|----|----|-----|----------|----------|-------------|---------|
| O5 | H5 | C11 | 0.84     | 2.25     | 3.0745 (19) | 169.1   |

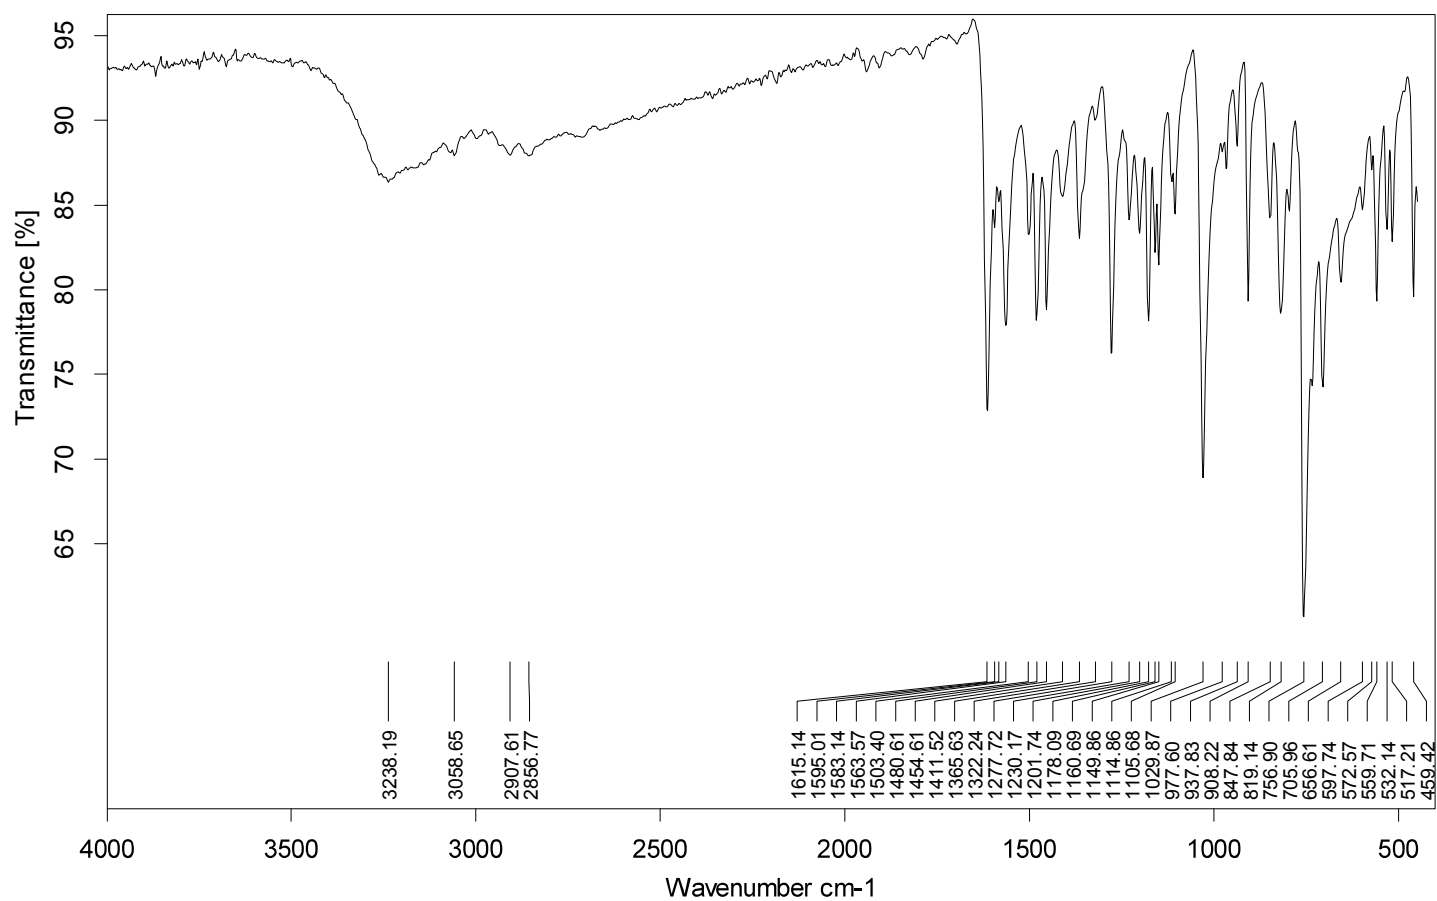

**Figure S1.** IR spectrum of H2L1-H [N-(2-hydroxymethylphenyl)salicylideneimine]salicylideneimine]

20/04/2018

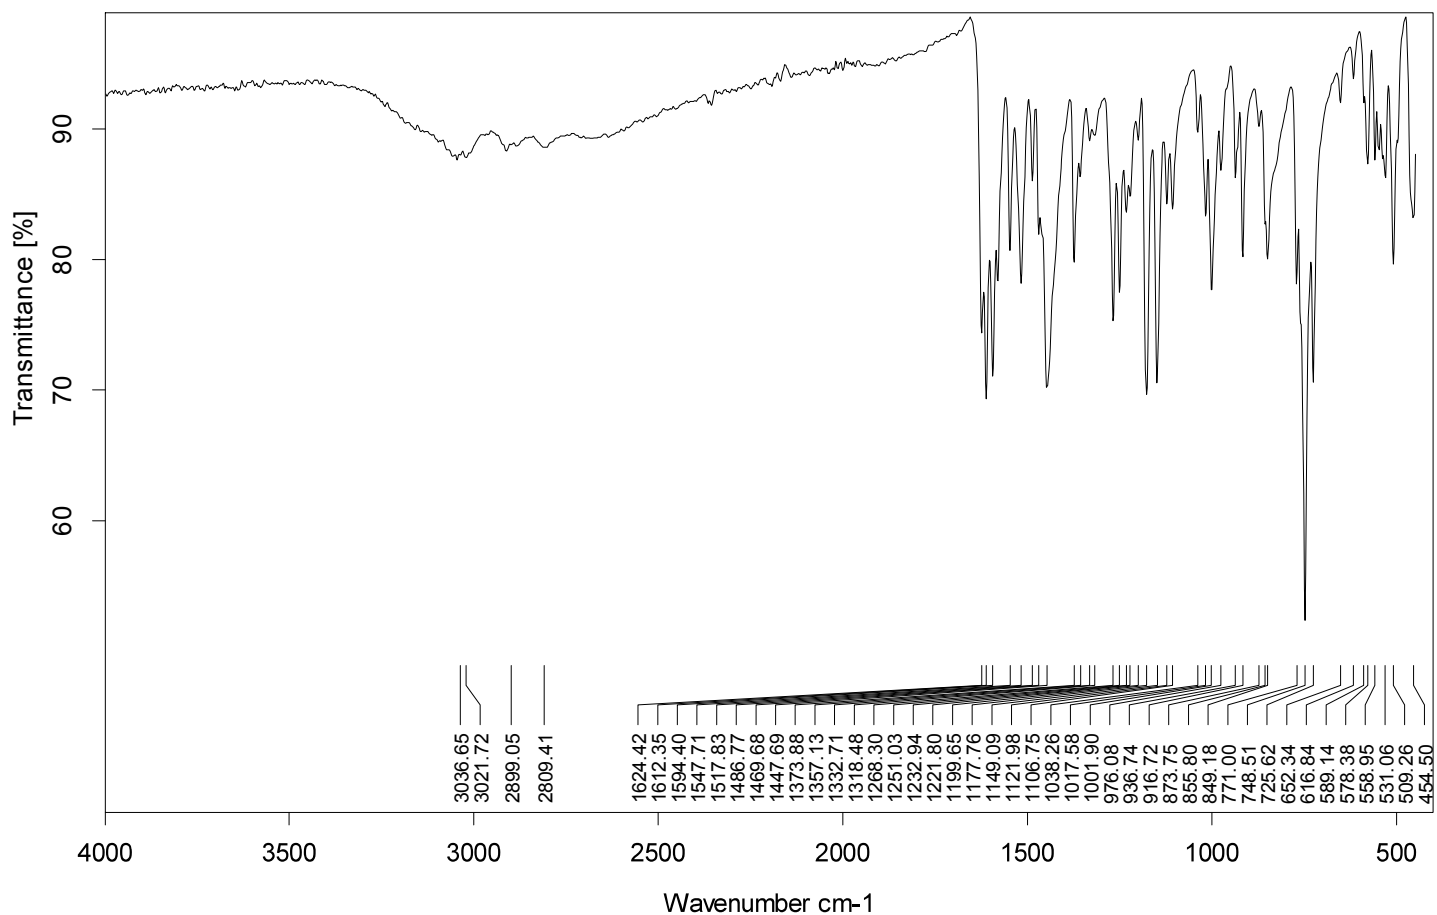

Figure S2. IR spectrum of 1.

24/01/2019

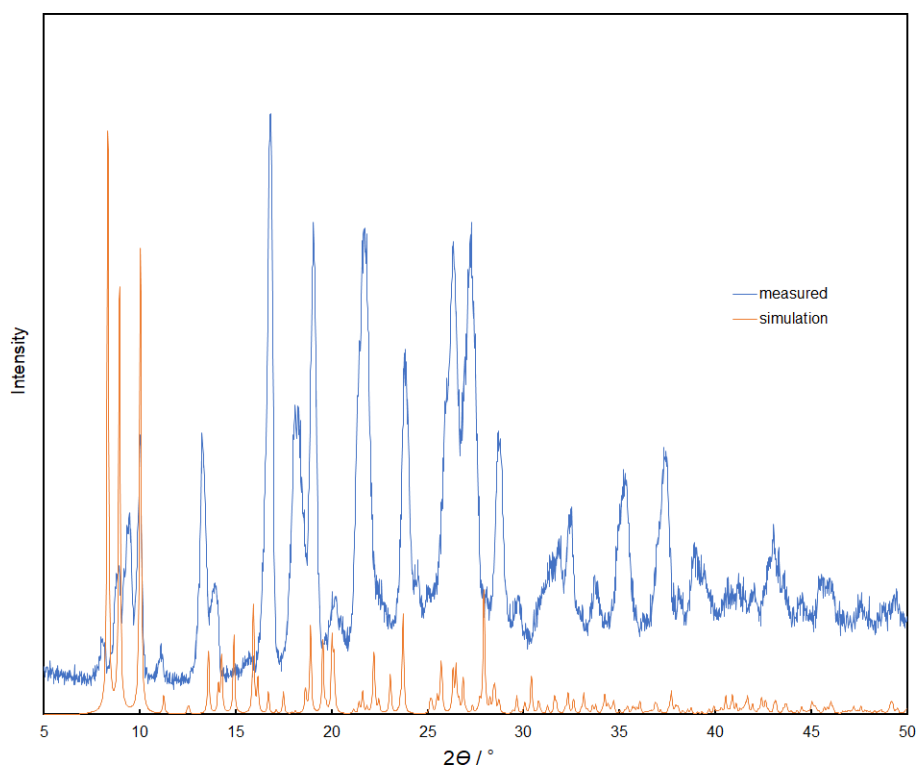

Figure S3. XRD patterns for 1; measuremental data at 25°C. (blue), simulation (orange).



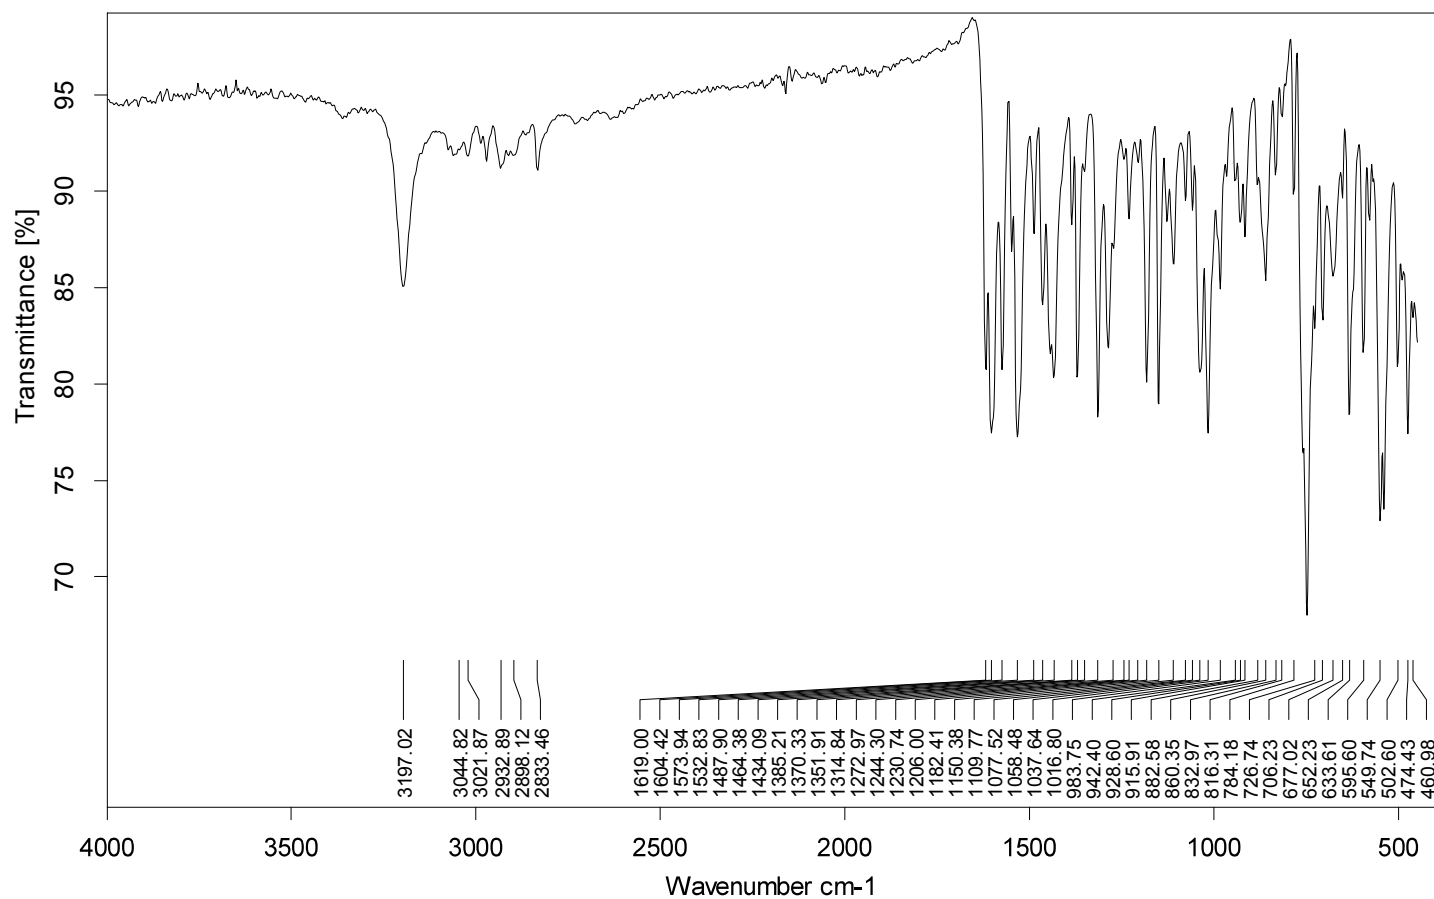

**Figure S4.** IR spectrum of **2**.

05/06/2017

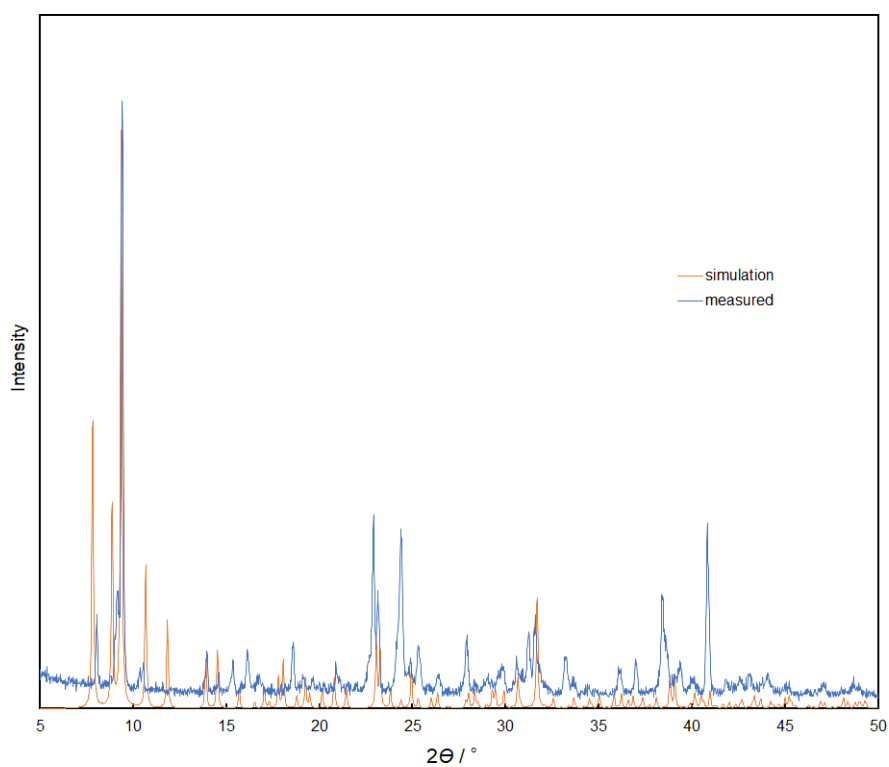

**Figure S5.** XRD patterns for **2**; measuremental data at 25°C (blue), simulation (orange).

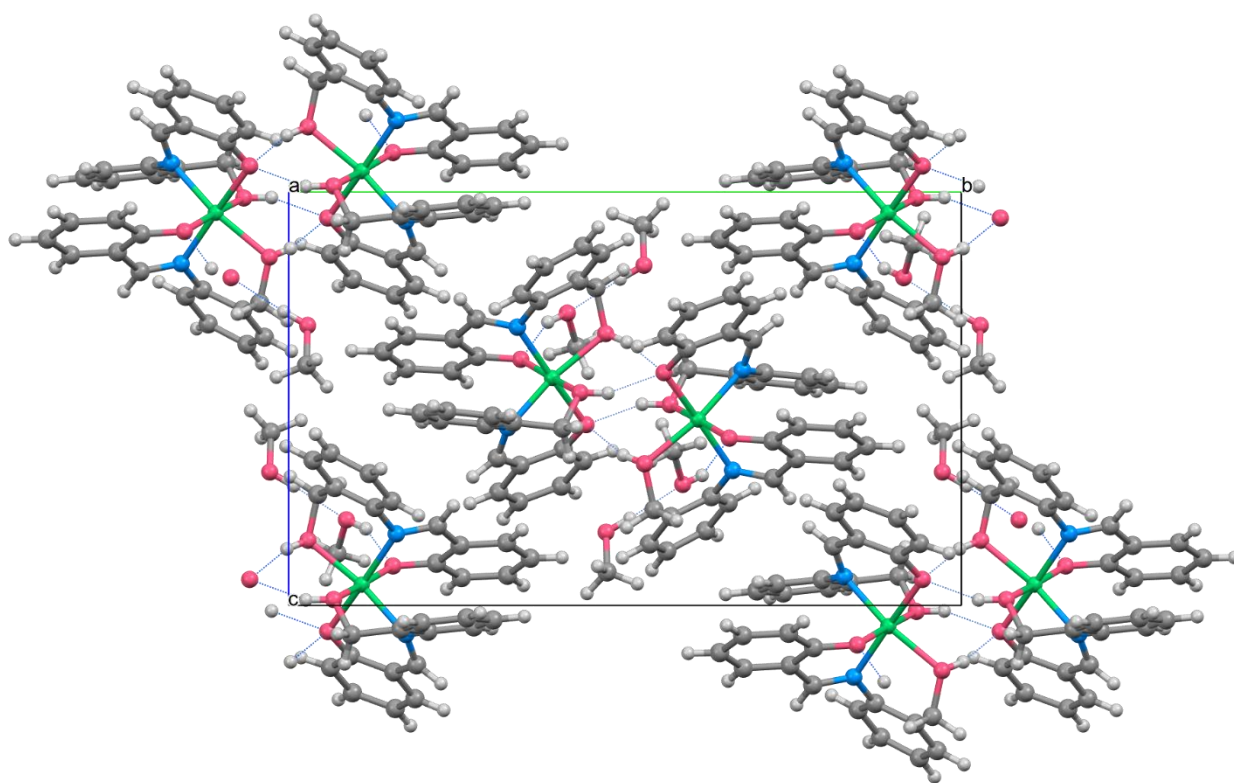

**Figure S6.** Crystal Packing diagram of **1**.

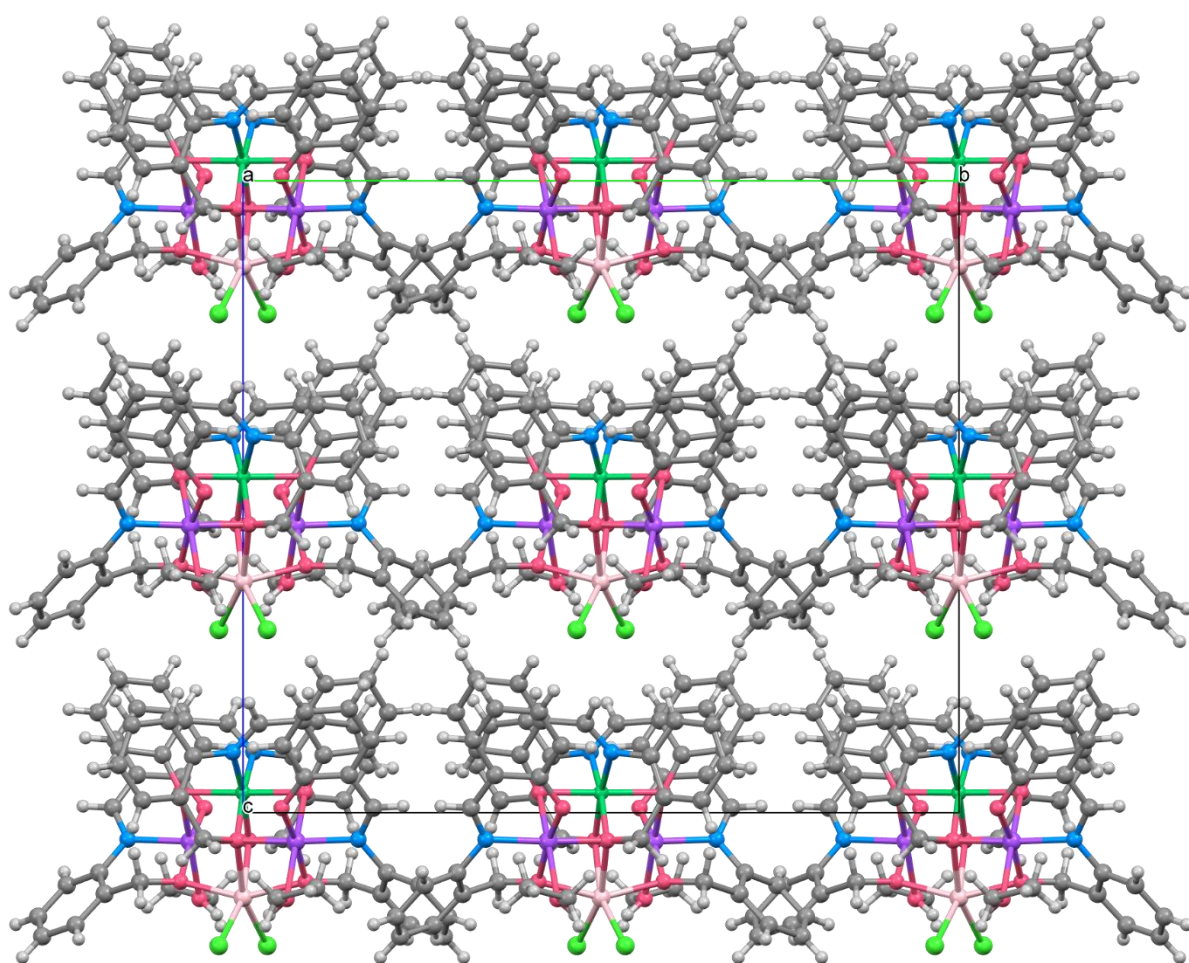

**Figure S7.** Crystal Packing diagram of **2**.

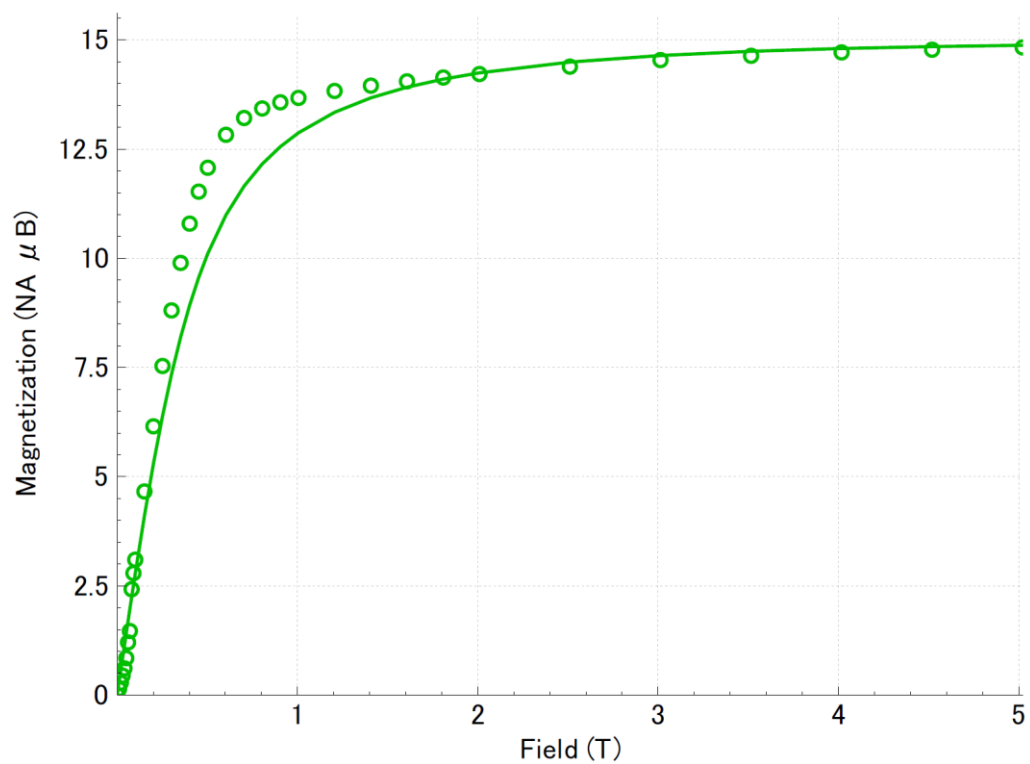

**Figure S8.** The plots of M–H for **2**. The line represents the fitting results by PHI.
